# Supplementary material for: The effects of pharmacological interventions on quality of life and fatigue in sarcoidosis: a systematic review
Source: PubMed Central journal article supplement — Eur Respir Rev. 2020 Jan 29;29(155):190057. doi: 10.1183/16000617.0057-2019 (PMC9488574; doi:10.1183/16000617.0057-2019), 2020-01-29
Supplement: err-0057-2019_SUPPLEMENTARY_MATERIAL.pdf [file err-0057-2019_SUPPLEMENTARY_MATERIAL.pdf]

The electronic database Medline (using Pubmed) was searched using the following search strategy: ("Sarcoidosis"[Mesh] OR "Sarcoidosis, Early-Onset" [Supplementary Concept] OR "Neurosarcoidosis" [Supplementary Concept] OR sarcoid\*[tiab] OR boeck\*[tiab] OR schaumann\*[tiab]) AND ("Anti-Inflammatory Agents"[Mesh] OR "Anti-Inflammatory Agents" [Pharmacological Action] OR "Central Nervous System Stimulants"[Mesh] OR "Central Nervous System Stimulants" [Pharmacological Action] OR "Drug Therapy"[Mesh] OR "drug therapy"[Subheading] OR anti-inflamm\*[tiab] OR antiinflamm\*[tiab] OR stimulant\*[tiab]) AND (Clinical trial\*[pt] OR "Prospective Studies"[Mesh] OR "quality of life"[MeSH] OR "fatigue"[MeSH] OR trial\*[tiab] OR clinical-study[tiab] OR prospectiv\*[tiab] OR randomi\*[tiab] OR quality-of-life[tiab] OR QOL[tiab] OR HRQOL[tiab] OR fatigue[tiab]) AND (english[la]).

The electronic database Embase was searched using the following search strategy:  
( 'sarcoidosis'/exp OR (sarcoid\* OR boeck\* OR schaumann\*):ab,ti) AND ('antiinflammatory agent'/exp/mj OR 'central stimulant agent'/exp/mj OR 'drug therapy'/exp/mj OR (anti-inflamm\* OR antiinflamm\* OR stimulant\*):ab,ti ) AND ('clinical trial'/de OR 'controlled clinical trial'/de OR 'prospective study'/de OR 'randomized controlled trial'/de OR 'quality of life'/exp OR 'fatigue'/exp OR (trial\* OR clinical-study OR prospectiv\* OR randomi\* OR quality-of-life OR QOL OR HRQOL OR fatigue):ab,ti ) NOT ( 'case report'/de OR 'review'/it OR 'conference abstract'/it OR 'conference paper'/it OR 'conference review'/it OR 'letter'/it) AND [English]/lim.
