# Supplementary material for: The effects of pharmacological interventions on quality of life and fatigue in sarcoidosis: a systematic review
Source: PubMed Central journal article supplement — Eur Respir Rev. 2020 Jan 29;29(155):190057. doi: 10.1183/16000617.0057-2019 (PMC9488574; doi:10.1183/16000617.0057-2019), 2020-01-29
Supplement: err-0057-2019_SUPPLEMENTARY_TABLE_S2.pdf [file err-0057-2019_SUPPLEMENTARY_TABLE_S2.pdf]

SUPPLEMENTARY TABLE S2 Risk of bias in included studies

| First author, year, [Ref]           | Random sequence generation                      | Allocation concealment                        | Blinding of participants and personnel     | Blinding of outcome assessment                       | Incomplete outcome data                                                             | Selective reporting                                                     | Other bias                                                                             | Overall risk of bias |
|-------------------------------------|-------------------------------------------------|-----------------------------------------------|--------------------------------------------|------------------------------------------------------|-------------------------------------------------------------------------------------|-------------------------------------------------------------------------|----------------------------------------------------------------------------------------|----------------------|
| Utz (2003) [11]                     | High risk<br>No randomisation                   | High risk<br>No concealment (open label)      | High risk<br>No blinding (open label)      | High risk<br>No blinding (open label)                | Unclear risk<br>No description of missing data or handling of missing data          | Unclear risk<br>No protocol available                                   | High risk<br>Study design limits conclusions: no control group                         | <i>High risk</i>     |
| Baughman (2006) [12]<br>(2015) [13] | Unclear risk<br>No description of randomisation | Unclear risk<br>No description of concealment | Unclear risk<br>No description of blinding | Unclear risk<br>No description of outcome assessment | Unclear risk<br>Last observation carried forward method, but no further information | Unclear risk<br>Missing follow-up 2 out 14 patients in infliximab group | Low risk<br>No other causes of bias identified. RCT, balanced baseline characteristics | <i>Unclear risk</i>  |
| Erckens (2012) [14]                 | High risk<br>No randomisation                   | High risk<br>No concealment (open label)      | High risk<br>No blinding (open label)      | High risk<br>No blinding (open label)                | Unclear risk<br>No description of missing data or handling of missing data          | Unclear risk<br>No protocol available                                   | High risk<br>Study design limits conclusions: no control group                         | <i>High risk</i>     |
| Milman (2012) [15]                  | High risk<br>No randomisation                   | High risk<br>No concealment (open label)      | High risk<br>No blinding (open label)      | High risk<br>No blinding (open label)                | Unclear risk<br>No description of missing data or handling of                       | Unclear risk<br>No protocol available                                   | High risk<br>Study design limits conclusions: no control group                         | <i>High risk</i>     |

|                     |                                                                    |                                                                         |                                                                                                            |                                                                                            | missing data                                                                                                                                                                                 |                                                                       |                                                                                      |                                       |
|---------------------|--------------------------------------------------------------------|-------------------------------------------------------------------------|------------------------------------------------------------------------------------------------------------|--------------------------------------------------------------------------------------------|----------------------------------------------------------------------------------------------------------------------------------------------------------------------------------------------|-----------------------------------------------------------------------|--------------------------------------------------------------------------------------|---------------------------------------|
| Pariser (2013) [16] | <i>RCT phase:</i><br>Low risk<br>Computer random number generation | <i>RCT phase:</i><br>Low risk<br>External randomisation and allocation. | <i>RCT phase:</i><br>Low risk<br>Adalimumab or identical vehicle solution in identical-appearing syringes. | <i>RCT phase:</i><br>Low risk<br>External randomisation and allocation, blinded study drug | <i>RCT phase:</i><br>Unclear risk                                                                                                                                                            | <i>RCT and open label phase:</i><br>Low risk<br>All outcomes reported | <i>RCT phase:</i><br>Low risk<br>No other causes of bias identified.                 | <i>RCT phase:</i><br>Low risk         |
|                     | <i>Open label phase:</i><br>High risk<br>No randomisation          | <i>Open label phase:</i><br>High risk<br>No concealment (open label)    | <i>Open label phase:</i><br>High risk<br>No blinding (open label)                                          | <i>Open label phase:</i><br>High risk<br>No blinding (open label)                          | <i>Open label phase:</i><br>Unclear risk<br>In group 1 n=2 lost to follow-up; unclear what happened with the data. No further description of missing data points or handling of missing data |                                                                       | <i>Open label:</i><br>High risk<br>Study design limits conclusions: no control group | <i>Open label phase:</i><br>High risk |

|                              |                                                     |                                                   |                                                                                  |                                                                 |                                                                                |                                           |                                                                                            |                     |
|------------------------------|-----------------------------------------------------|---------------------------------------------------|----------------------------------------------------------------------------------|-----------------------------------------------------------------|--------------------------------------------------------------------------------|-------------------------------------------|--------------------------------------------------------------------------------------------|---------------------|
| Judson<br>(2014)<br>[17]     | Unclear risk<br><br>No description of randomisation | Unclear risk<br><br>No description of concealment | Unclear risk<br><br>No description of blinding                                   | Unclear risk<br><br>No description of outcome assessment        | Unclear risk<br><br>No description of missing data or handling of missing data | Low risk<br><br>All outcomes reported     | Low risk<br><br>No other causes of bias identified. RCT, balanced baseline characteristics | <i>Unclear risk</i> |
| Vorselaars<br>(2015)<br>[18] | High risk<br><br>No randomisation                   | High risk<br><br>No concealment (open label)      | High risk<br><br>No blinding (open label)                                        | High risk<br><br>No blinding (open label)                       | Unclear risk<br><br>No description of missing data or handling of missing data | Unclear risk<br><br>No protocol available | High risk<br><br>Study design limits conclusions: no control group                         | <i>High risk</i>    |
| Aggarwal<br>(2016)<br>[19]   | High risk<br><br>No randomisation                   | High risk<br><br>No concealment (open label)      | High risk<br><br>No blinding (open label)                                        | High risk<br><br>No blinding (open label)                       | Unclear risk<br><br>No description of missing data or handling of missing data | Unclear risk<br><br>No protocol available | High risk<br><br>Study design limits conclusions: no control group                         | <i>High risk</i>    |
| Baughman<br>(2017)<br>[20]   | Unclear risk<br><br>No description of randomisation | High risk<br><br>Single blind trial               | High risk<br><br>No blinding: single-blind trial with only investigators blinded | Unclear risk<br><br>No description of blinding of investigators | Unclear risk<br><br>No description of missing data or handling of missing data | Low risk<br><br>All outcomes reported     | High risk<br><br>Study design limits conclusions: no placebo control group                 | <i>High risk</i>    |
| Judson<br>(2006)             | High risk                                           | High risk                                         | High risk                                                                        | High risk                                                       | Unclear risk                                                                   | Unclear risk                              | High risk                                                                                  | <i>High risk</i>    |

|                   |                                                                          |                                                                                |                                                                                |                                                                                |                                                                                                                               |                                             |                                                                                                 |                     |
|-------------------|--------------------------------------------------------------------------|--------------------------------------------------------------------------------|--------------------------------------------------------------------------------|--------------------------------------------------------------------------------|-------------------------------------------------------------------------------------------------------------------------------|---------------------------------------------|-------------------------------------------------------------------------------------------------|---------------------|
| [21]              | No randomisation                                                         | No concealment (open label)                                                    | No blinding (open label)                                                       | No blinding (open label)                                                       | Only per protocol analysis of SF-36                                                                                           | No protocol available                       | Study design limits conclusions: no control group                                               |                     |
| Heij (2012) [22]  | Low risk<br>Computer-generated randomisation code                        | Low risk<br>Randomisation and drug dispensing performed by research pharmacist | Low risk<br>Randomisation and drug dispensing performed by research pharmacist | Low risk<br>Randomisation and drug dispensing performed by research pharmacist | Low risk<br>Last observation carried forward, missing data points explained.                                                  | Low risk<br>All outcomes reported           | Unclear risk<br>Potential baseline imbalance in SF-36 and FAS; no baseline data SF-36 PF and BP | <i>Low risk</i>     |
| Drake (2013) [23] | High risk<br>No randomisation                                            | High risk<br>No concealment (open label)                                       | High risk<br>No blinding (open label)                                          | High risk<br>No blinding (open label)                                          | Unclear risk<br>Only per protocol analysis of SGRQ                                                                            | High risk<br>HRQL outcome not pre-specified | High risk<br>Only 8 of 15 enrolled patients completed intervention                              | <i>High risk</i>    |
| Lower (2008) [24] | Low risk<br>Random-sequence generator without blocking or stratification | Low risk<br>Randomisation and drug dispensing performed by research pharmacist | Low risk<br>Randomisation and drug dispensing performed by research pharmacist | Low risk<br>Randomisation and drug dispensing performed by research pharmacist | Unclear risk<br>Lost to follow-up n=0 in both arms, however no description of missing data points or handling of missing data | Low risk<br>All outcomes reported           | Low risk<br>No other causes of bias identified. RCT with cross-over design.                     | <i>Low risk</i>     |
| Lower (2013)      | Unclear risk                                                             | Unclear risk                                                                   | Unclear risk                                                                   | Unclear risk                                                                   | Unclear risk                                                                                                                  | Low risk                                    | Low risk                                                                                        | <i>Unclear risk</i> |

---

|      |                                                                                            |                               |                            |                            |                                                            |                       |                                                                 |
|------|--------------------------------------------------------------------------------------------|-------------------------------|----------------------------|----------------------------|------------------------------------------------------------|-----------------------|-----------------------------------------------------------------|
| [25] | No description of randomisation. Unlikely to introduce bias, considering cross-over design | No description of concealment | No description of blinding | No description of blinding | No description of missing data or handling of missing data | All outcomes reported | No other causes of bias identified. RCT with cross-over design. |
|------|--------------------------------------------------------------------------------------------|-------------------------------|----------------------------|----------------------------|------------------------------------------------------------|-----------------------|-----------------------------------------------------------------|

---
